# Supplementary material
Source: PubMed Central journal article supplement (PMC2748410)
Supplement: NIHMS103251-supplement-supplement_1.pdf [file NIHMS103251-supplement-supplement_1.pdf]

**Fixation and Immunostaining.** HPC and osteoblast co-cultures were fixed with 4% paraformaldehyde for 15 min at room temperature followed by a 1xPBS wash. Cells were blocked and permeablized in 1xPBS with 10mg/ml of BSA and 0.3% tween-20. Cells were stained at 4°C for approximately 15 h with anti-cd45 (Calbiochem, Gibbstown, NJ), anti-AC133 (prominin-1, Miltenyi Biotec, Germany), anti-CD49d (Calbiochem, Gibbstown, NJ), anti-SARA (Santa Cruz Biotechnology, Santa Cruz, CA), anti-Smad2/3 (BD Biosciences, San Jose, CA) and anti-SDF-1 (Santa Cruz Biotechnology, Santa Cruz, CA). Cells were washed gently with 1xPBS followed by incubation with Alexa-488 goat anti-mouse antibody (Invitrogen, Carlsbad, CA) or Cy3-goat anti-rabbit antibody (Jackson ImmunoResearch, West Grove, PA) for 1 h at room temperature. Cells were washed following secondary antibody with 1xPBS and mounted in Flouromount-G (Southern Biotech, Birmingham, AL) for imaging.

#### **Scanning Electron Microscopy.**

Cells were rinsed twice with PBS and fixed with 2% glutaraldehyde in 0.1 mol/l Na-cacodylate buffer (with 0.1 mol/l sucrose) at pH 7.4 for 12 h. They were subsequently treated with 1% tannic acid in 0.15 mol/l Na-cacodylate at pH 7.4 for 1 h and post-fixed with 1% osmium tetroxide in 0.1 mol/l Na-cacodylate at pH 7.4 for 1 h. Samples were dehydrated in a graded ethanol series.

**Statistical Analysis.** Error bars are shown as standard deviations and Student *t*-tests were used as a statistical test for all data.

#### **Acknowledgements**

We are grateful to Victoria Cogger (University of Sydney, ANZAC Research Institute) for her assistance with scanning electron microscopy. We would also like to thank Denis Corbeil (University of Dresden) for providing the prominin 1-GFP construct, and Suliana Manley and George Patterson (NIH) for critical reading of the manuscript. This project was supported by the Intramural Research Program of the US National Institute of Child Health and Human Development, National Institutes of Health.

#### **Supplemental Movies**

Supp. Mov. 1: Time-lapse movie of CD34+ cells co-cultured with GalT-GFP expressing osteoblasts.

Supp. Mov. 2: Time-lapse movie of PKH26 labeled KG1a cells co-cultured with osteoblasts expressing PH-Akt-GFP.

Supp. Mov. 3: Time-lapse movie of N-Rh-PE labeled CD34+CD38- cells co-cultured with primary human osteoblasts.

Supp. Mov. 4: Time-lapse movie of a QD labeled KG1a cell co-cultured with a tubulin-YFP expressing osteoblast.

Supp. Mov. 5: Time-lapse movie of a KG1a cell transiently transfected with CD63-cherry and co-cultured with tubulin-YFP expressing osteoblasts.

Supp. Mov. 6: Time-lapse movie of a CD34+ cell labeled with N-Rh-PE and co-cultured with osteoblasts.
